# Supplementary material for: Fluorescence studies and photocatalytic application for hydrogen production of ZnII and CdII complexes with isophthaloylbis(thioureas)
Source: Royal Society of Chemistry journal article supplement (doi:10.1039/d0nj03778h), 2020-01-01
Supplement: d0nj03778h1.pdf [file d0nj03778h1.pdf]

## SUPPLEMENTARY MATERIAL

### Fluorescence studies and photocatalytic application for hydrogen production of Zn<sup>II</sup> and Cd<sup>II</sup> complexes with isophthaloylbis(thioureas)

Vânia Denise Schwade <sup>a,\*</sup>, Estefane Isis Teixeira <sup>b</sup>, Fábio Alencar dos Santos <sup>b</sup>, Tanize Bortolotto <sup>a</sup>, Bárbara Tirloni <sup>a</sup>, Ulrich Abram <sup>c</sup>

<sup>a</sup> Department of Chemistry, Natural and Exact Sciences Centre, Federal University of Santa Maria, Av. Roraima, n.1000, 97105-900, Santa Maria/RS, Brazil

<sup>b</sup> Faculty of Exact Sciences and Technology, Federal University of Grande Dourados, Rod. Dourados/Itahum, Km 12, 79804-970, Dourados/MS, Brazil

<sup>c</sup> Institute of Chemistry and Biochemistry, Freie Universität Berlin, Fabeckstr. 34-36, D-14195, Berlin, Germany

Corresponding author

\* [vanciaschwade@gmail.com](mailto:vanciaschwade@gmail.com) and [vania.schwade@ufsm.br](mailto:vania.schwade@ufsm.br)

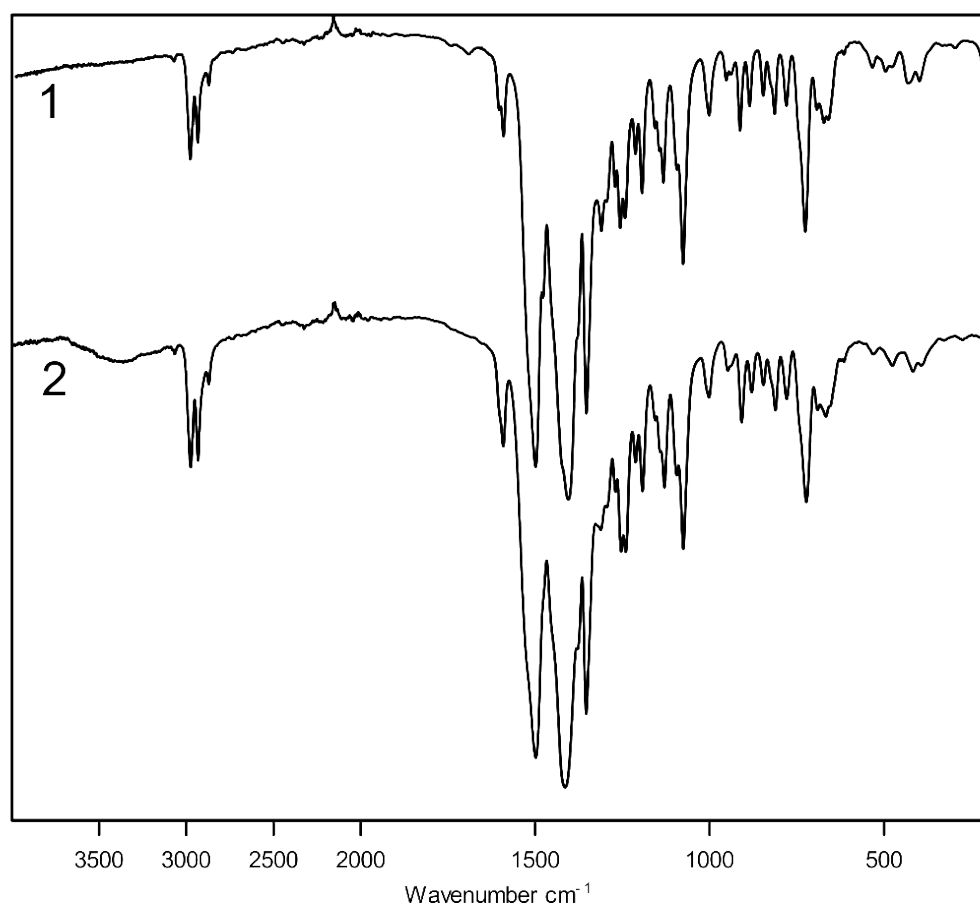

Figure S1. FT-IR spectra of compounds **1** and **2** in the 4000–200 cm<sup>-1</sup> range.

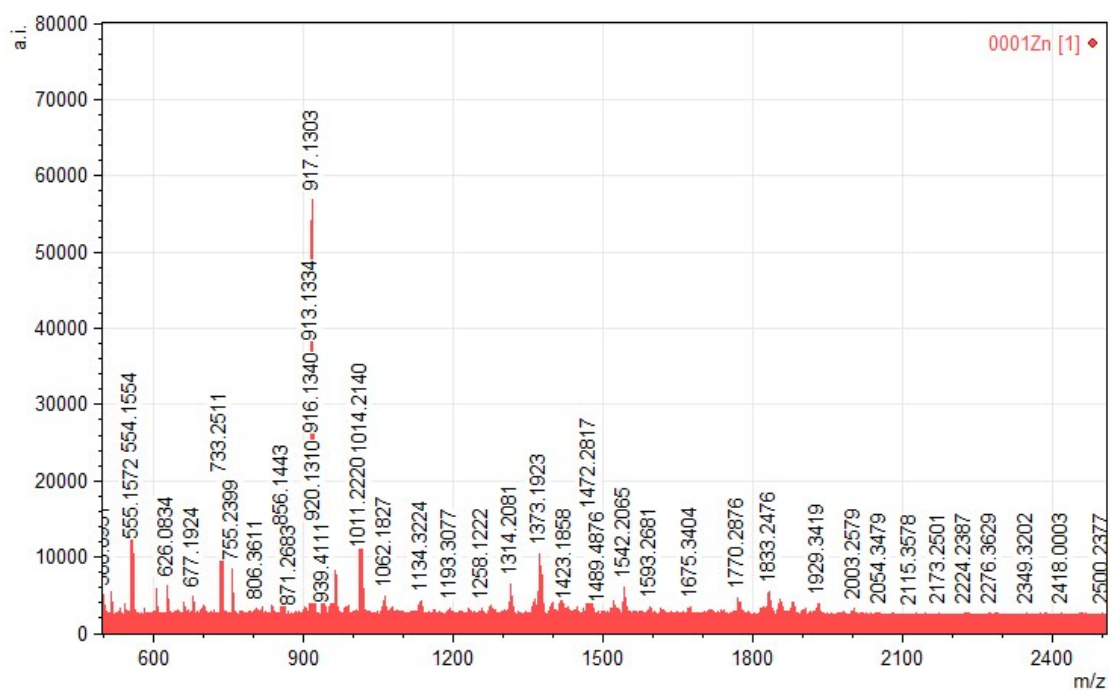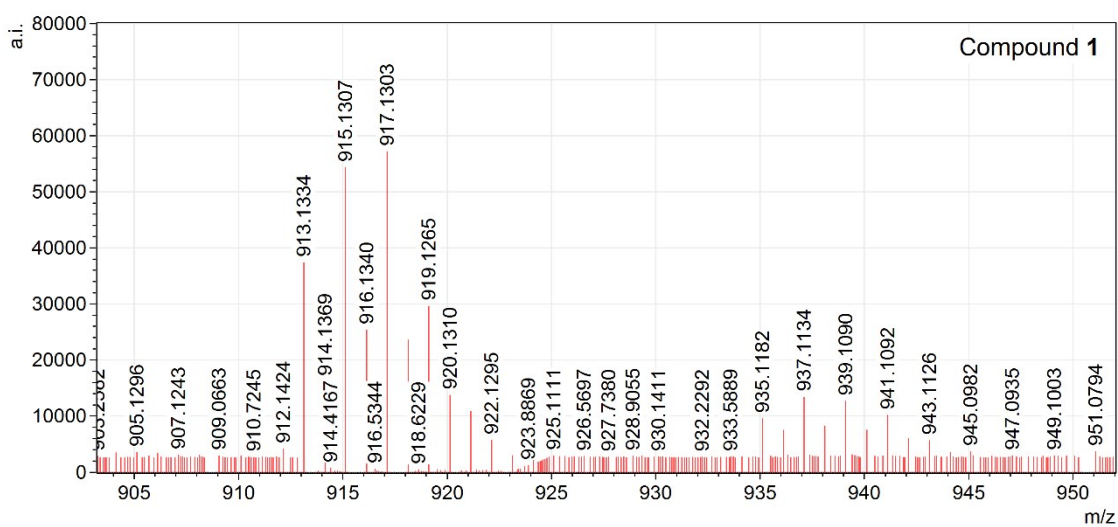

Figure S2. ESI-MS spectrum of compound 1 in the positive mode.



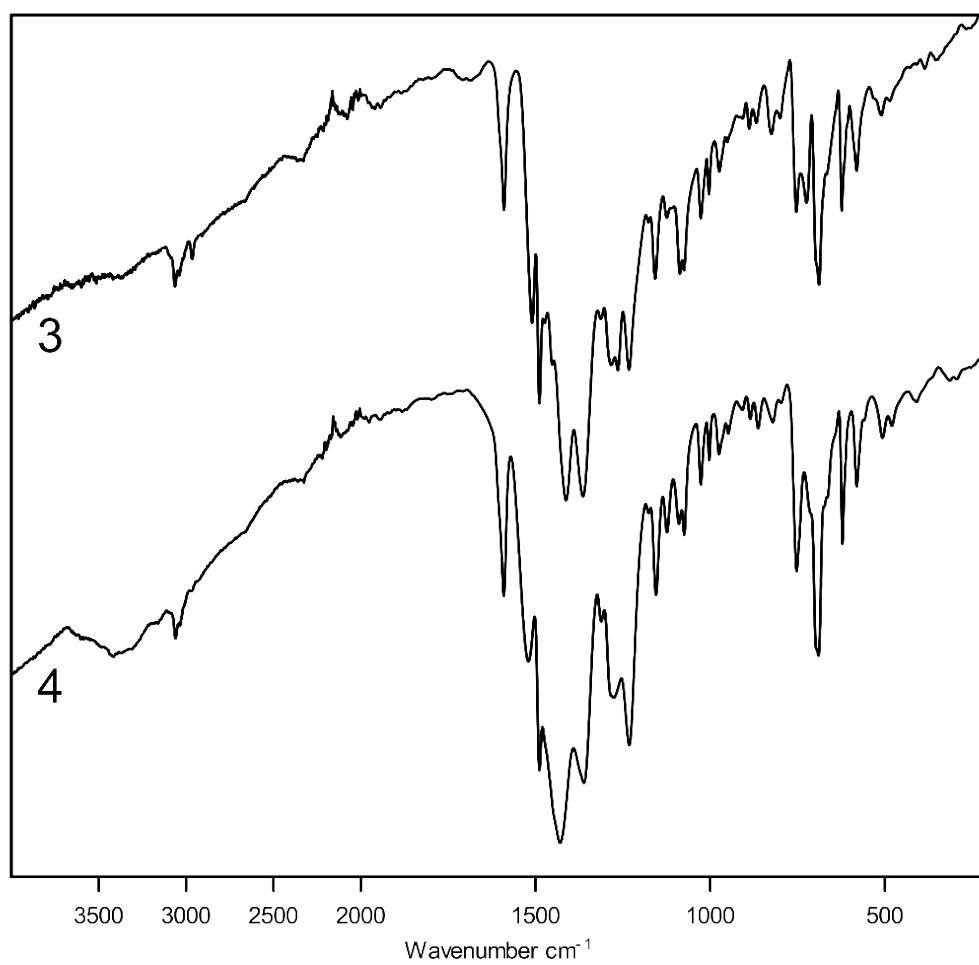

Figure S4. FT-IR spectra of compounds **3** and **4** in the 4000–200 cm<sup>-1</sup> range.

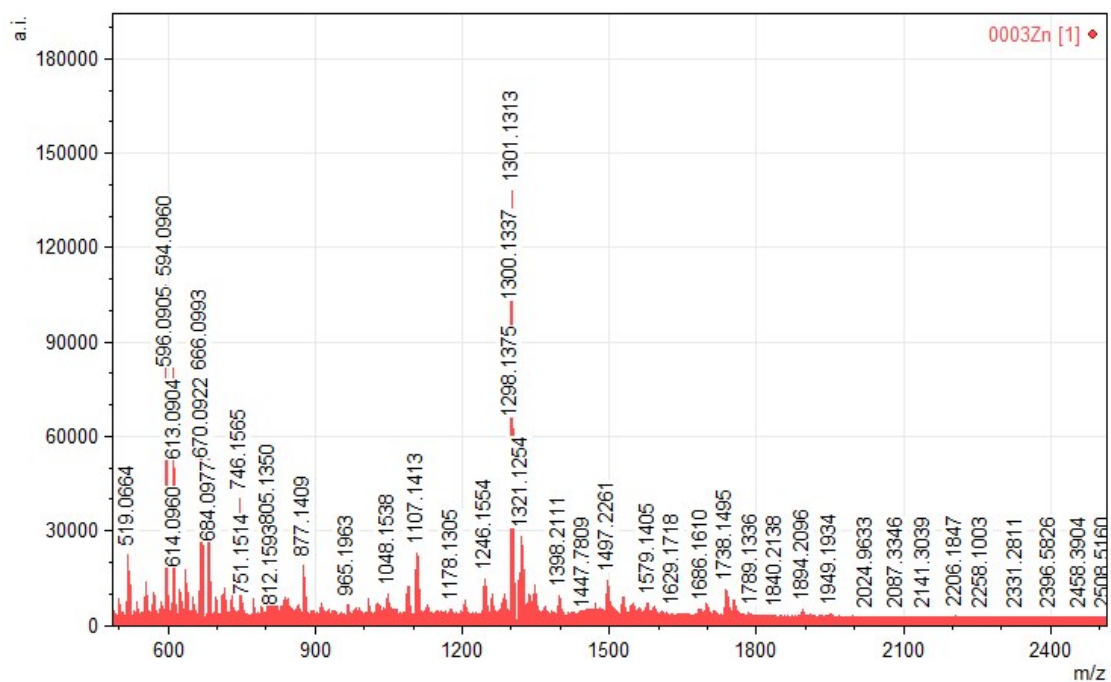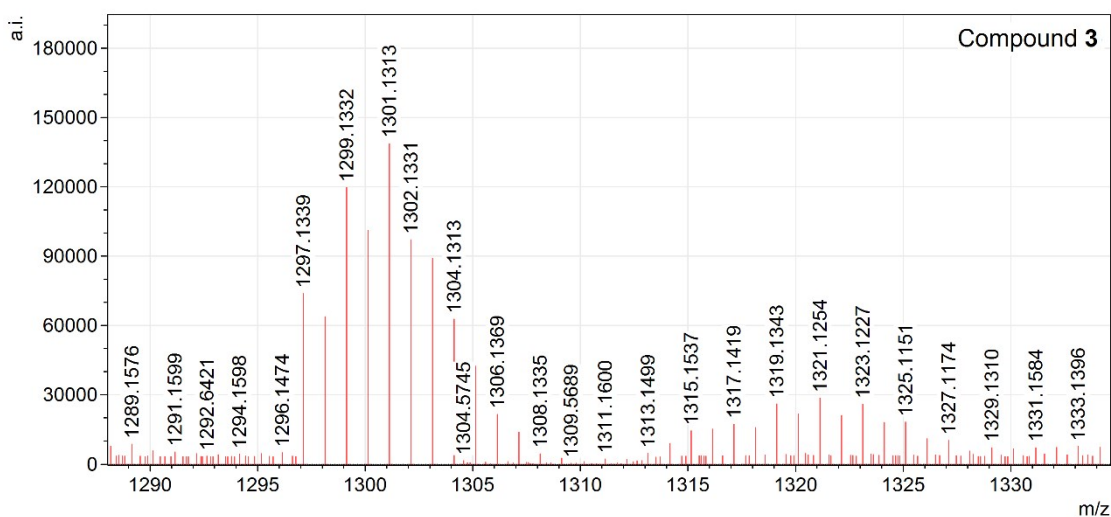

Figure S5. ESI-MS spectrum of compound **3** in the positive mode.

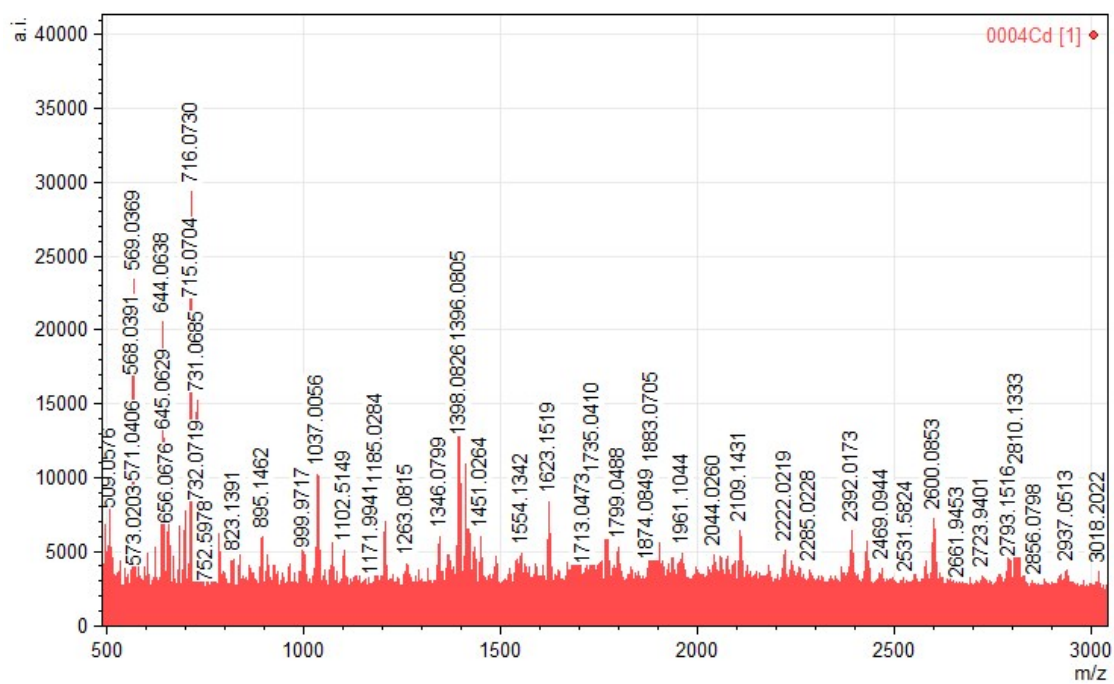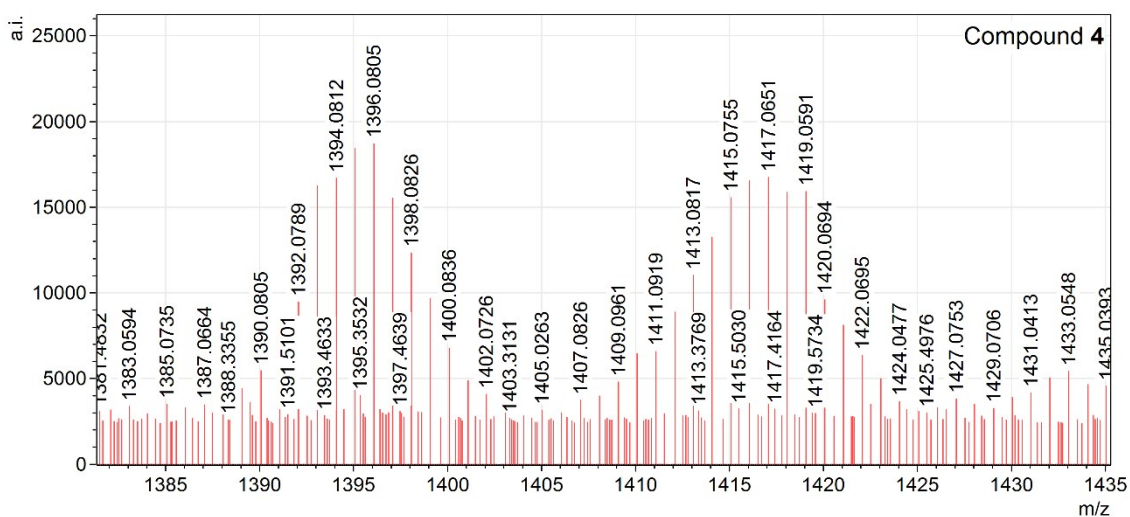

Figure S6. ESI-MS spectrum of compound 4 in the positive mode.

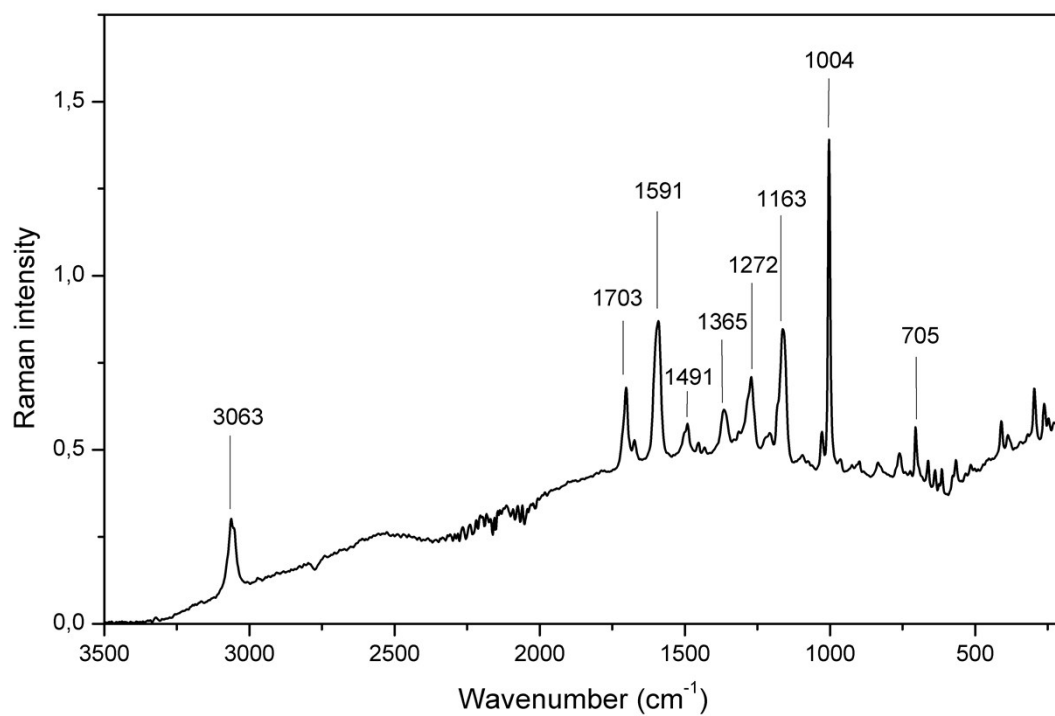

Figure S7. Raman spectrum of  $\text{H}_2\text{L}^{\text{Ph}}$  in the 3500–200  $\text{cm}^{-1}$  range.

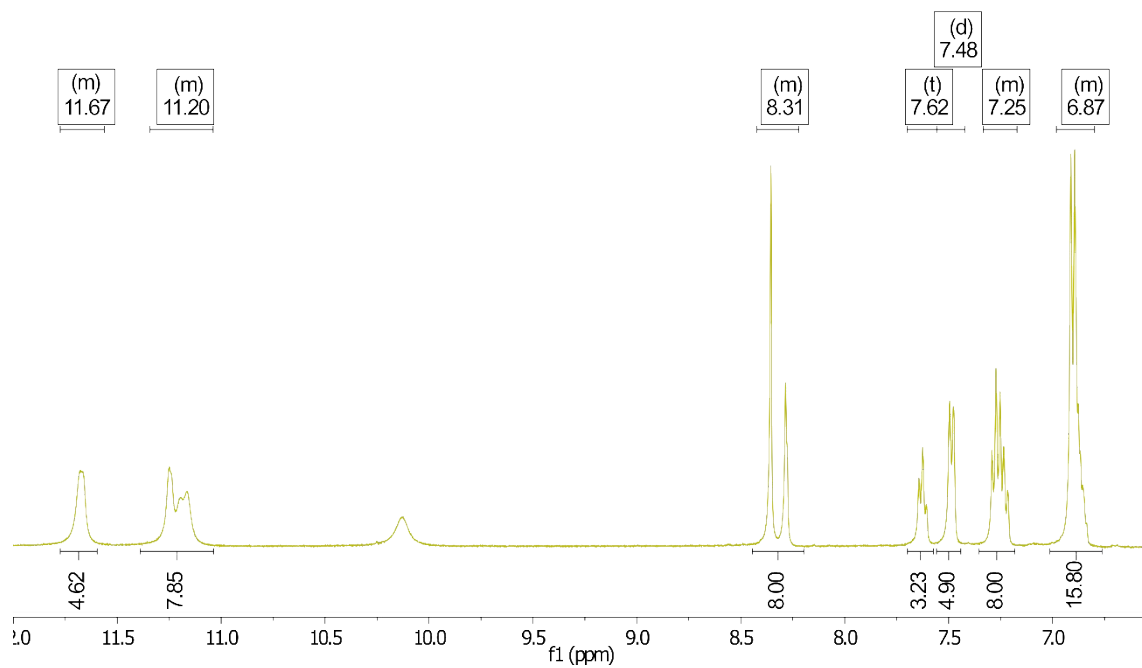

Figure S8.  $^1\text{H}$  NMR spectrum of complex **3** in  $\text{DMSO}-d_6$ .

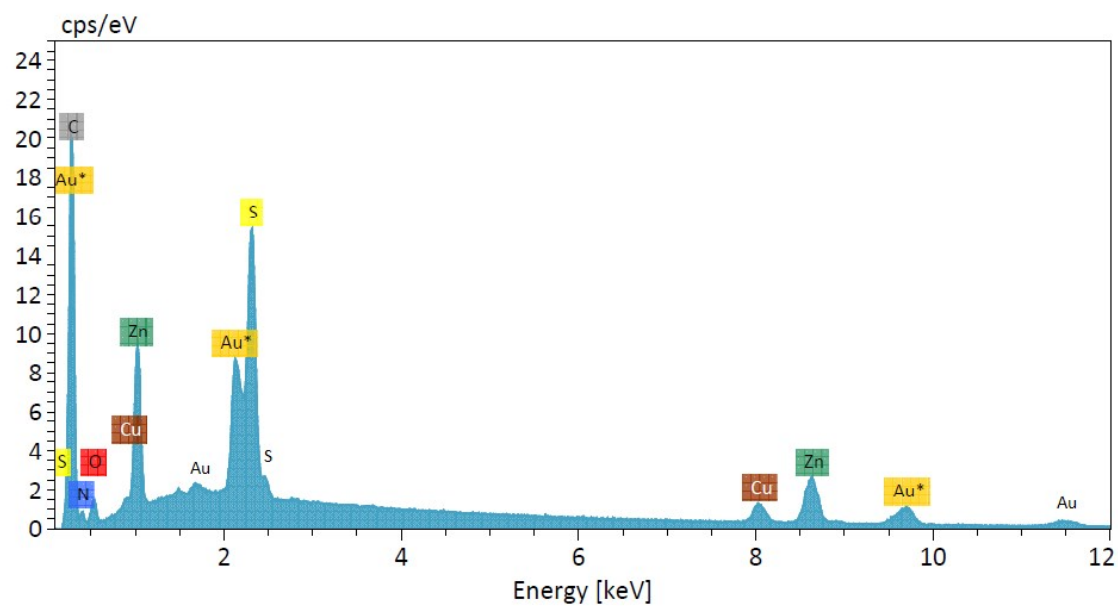

Figure S9. EDS spectrum of the  $[\text{Zn}_2(\text{L}^{\text{Et}})_2]$  compound. The elements Cu and Au come from the stub and the metallization process, respectively.

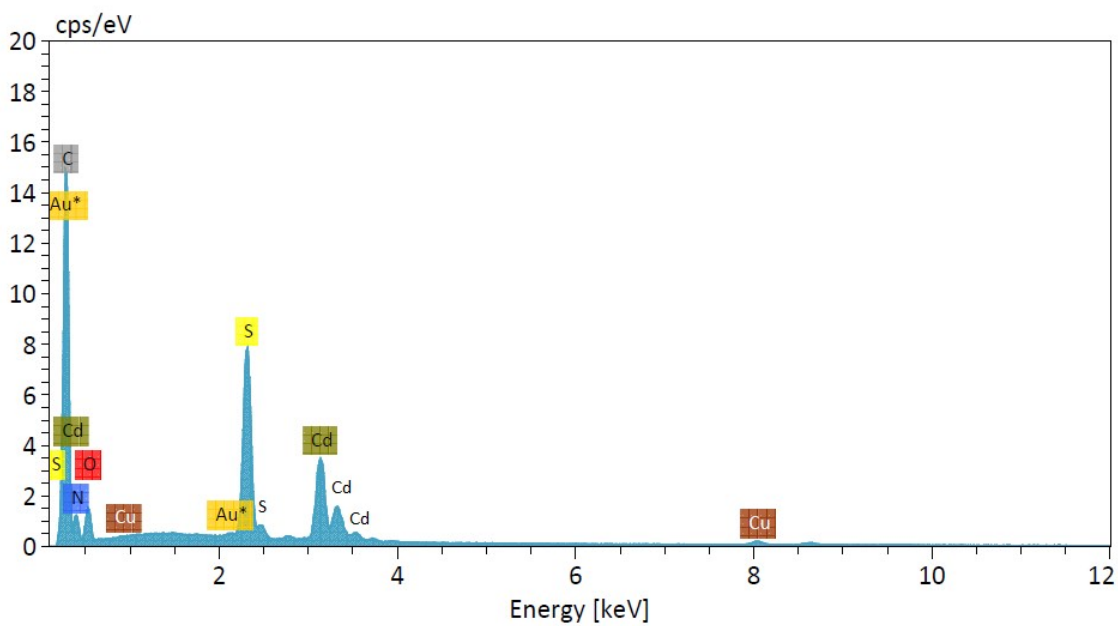

Figure S10. EDS spectrum of the  $[\text{Cd}_2(\text{L}^{\text{Et}})_2]$  compound. The elements Cu and Au come from the stub and the metallization process, respectively.

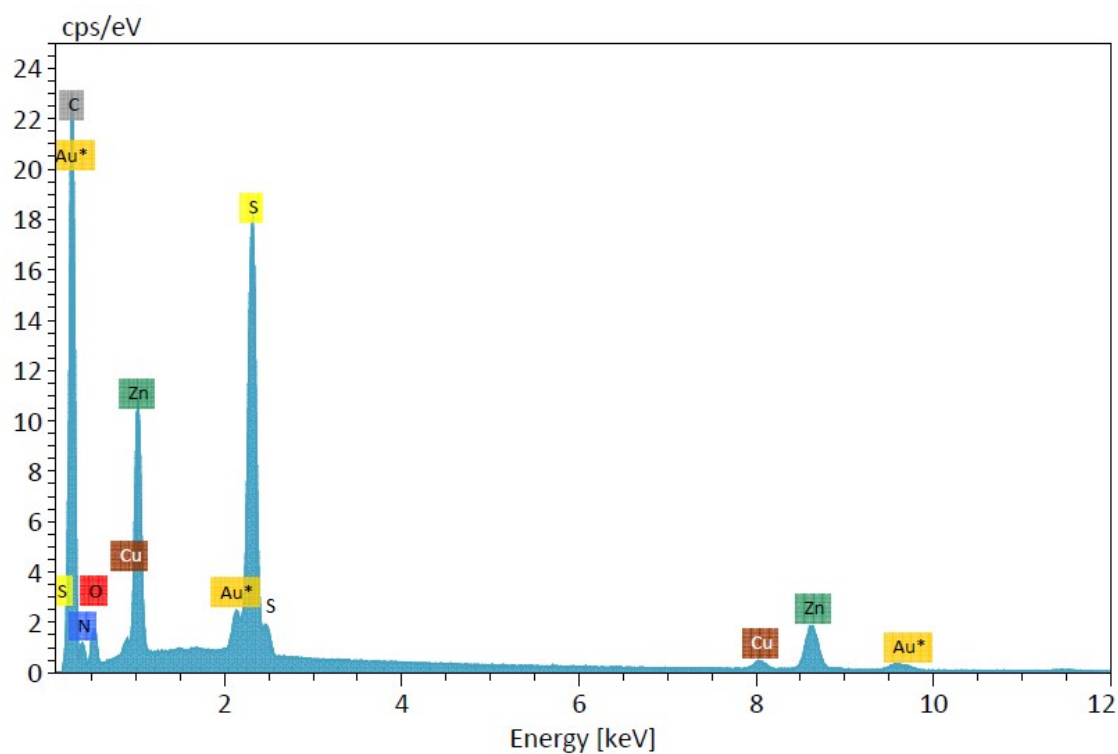

Figure S11. EDS spectrum of the  $[\text{Zn}(\text{HL}^{\text{Ph}})_2(\text{H}_2\text{O})]$  compound. The elements Cu and Au come from the stub and the metallization process, respectively.

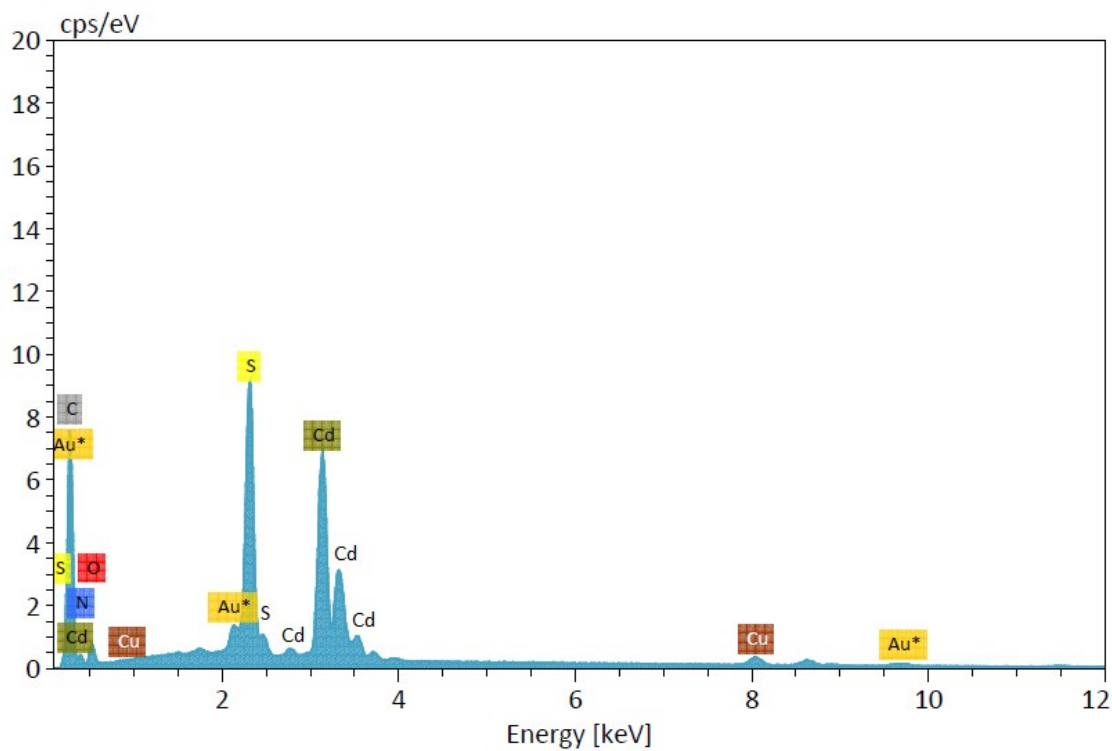

Figure S12. EDS spectrum of the  $[\text{Cd}_2(\text{L}^{\text{Ph}})_2]$  compound. The elements Cu and Au come from the stub and the metallization process, respectively.

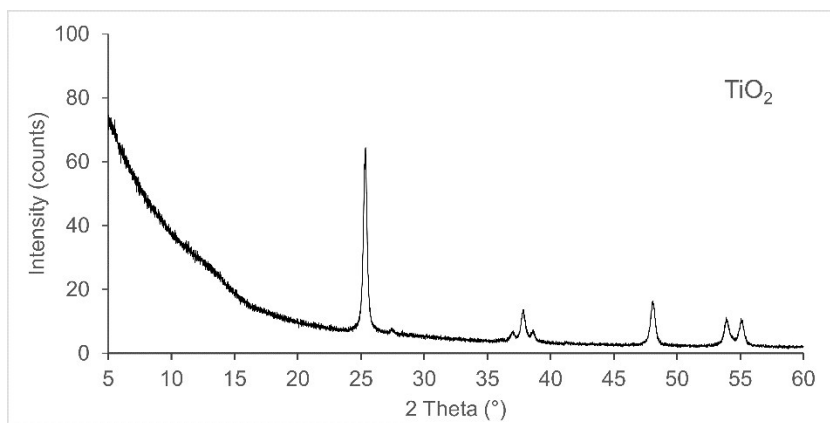

Figure S13. PXRD diffractogram of the prepared  $\text{TiO}_2$ .

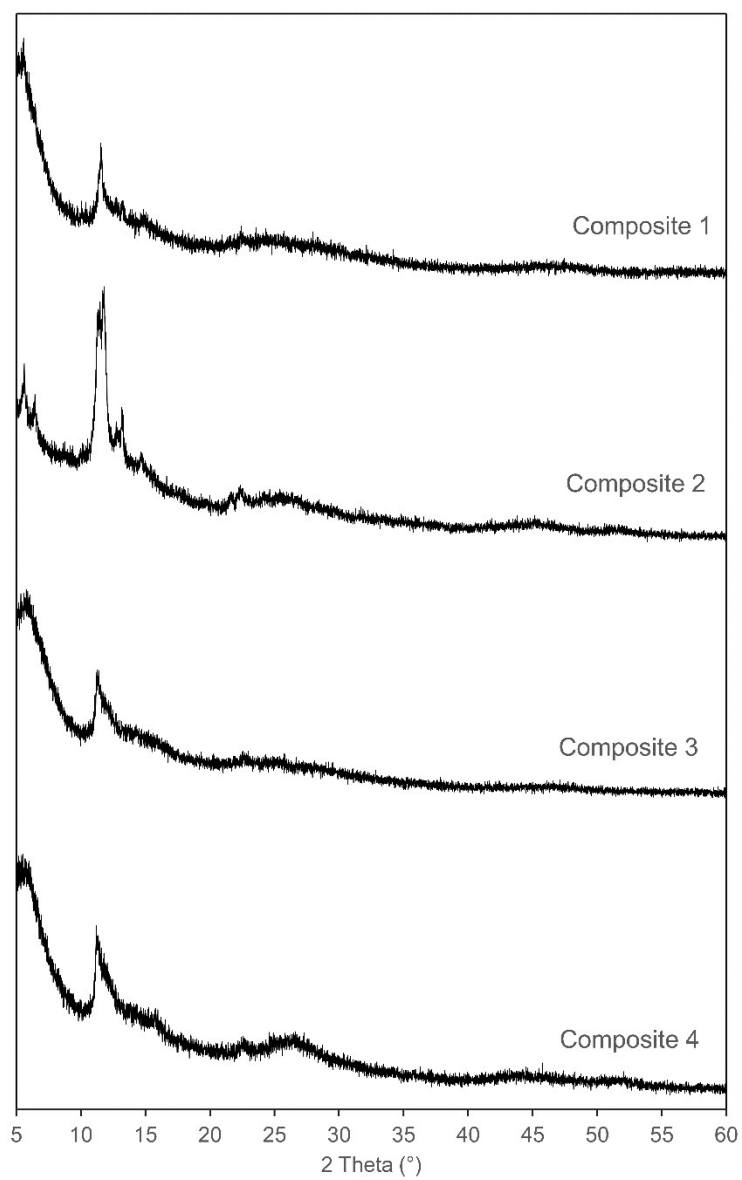

Figure S14. PXRD diffractograms of composites  $\text{TiO}_2$ -1– $\text{TiO}_2$ -4 using acrylic sample holder.

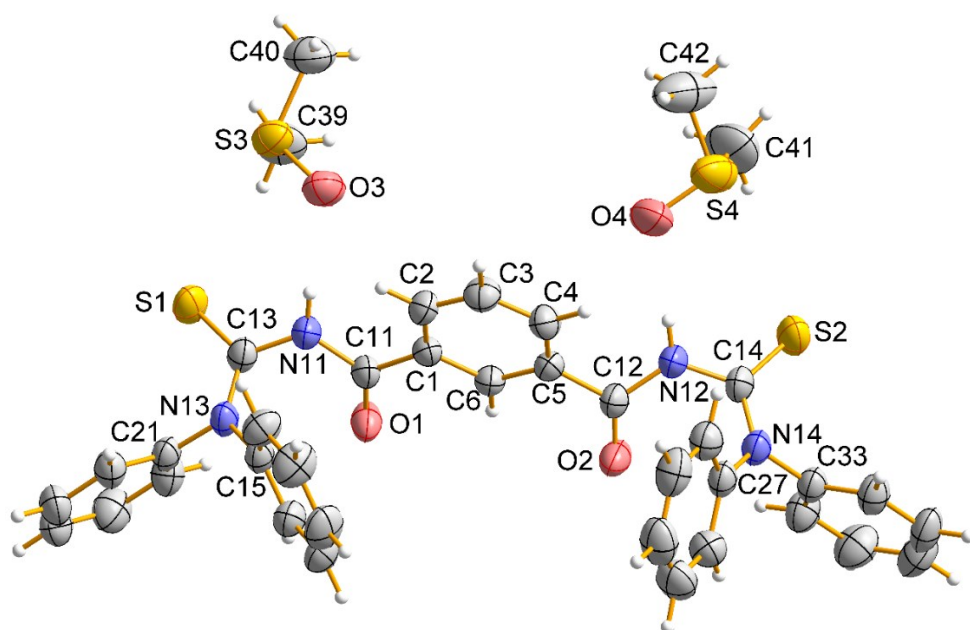

Figure S15. Anisotropic thermal ellipsoids plot at 50% probability of the  $\text{H}_2\text{L}^{\text{Ph}}$  ligand as a dimethyl sulfoxide solvate crystallization.

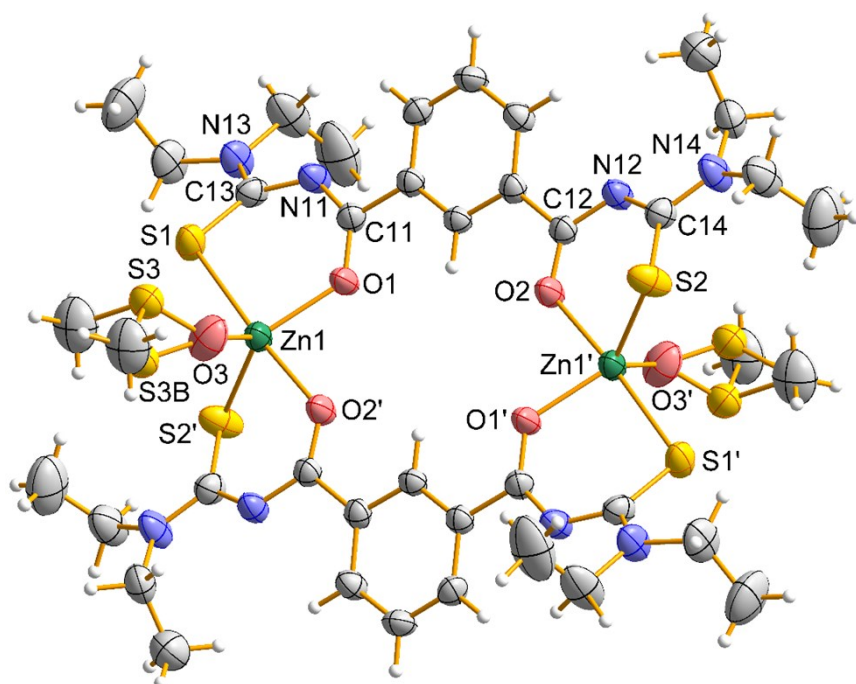

Figure S16. Anisotropic thermal ellipsoids plot at 50% probability of  $[\text{Zn}_2(\text{L}^{\text{Et}})_2(\text{dmsO})_2]$  (adduct of complex **1**). The coordinated dimethyl sulfoxide molecule is disordered at the sulfur atom (S3/S3B). Symmetry code:  $-x+1, -y+2, -z+1$ .

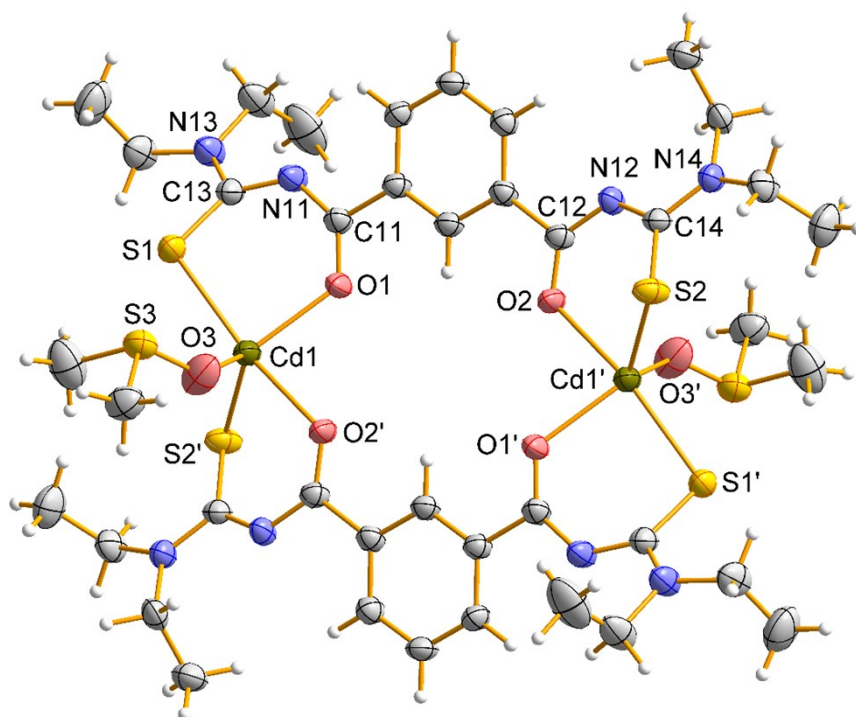

Figure S17. Anisotropic thermal ellipsoids plot at 50% probability of  $[\text{Cd}_2(\text{L}^{\text{Et}})_2(\text{dmsO})_2]$  (adduct of complex 2). Symmetry code:  $-x+1, -y+1, -z+1$ .

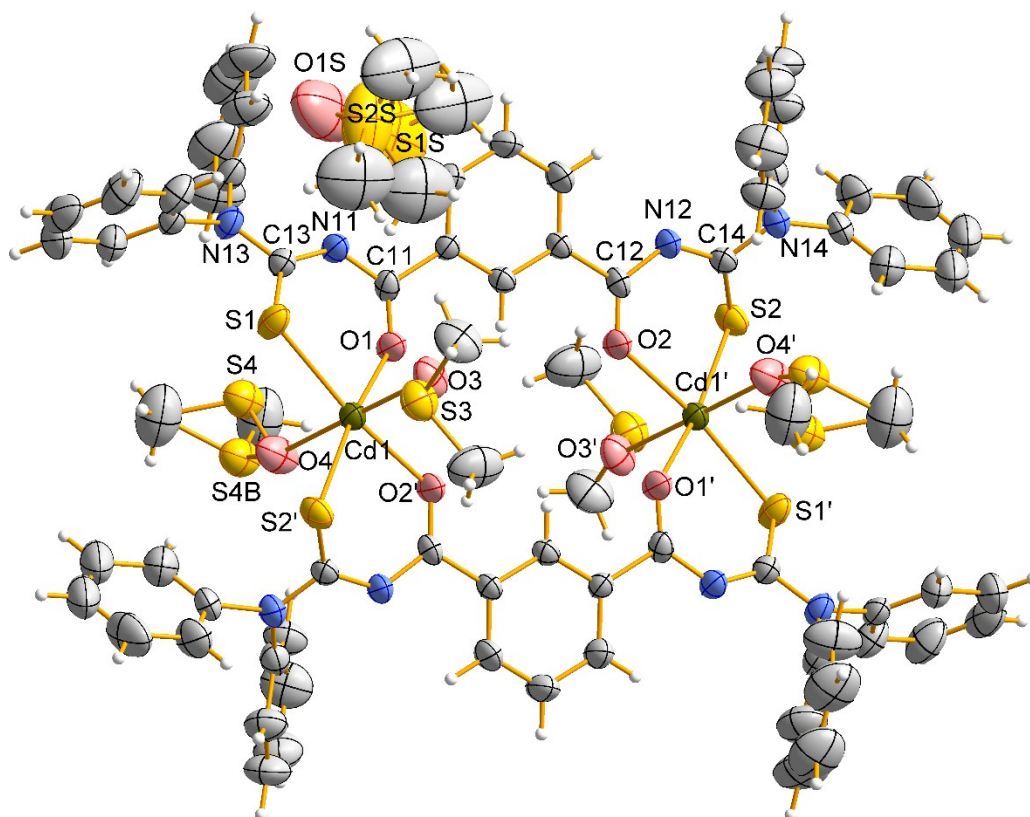

Figure S18. Anisotropic thermal ellipsoids plot at 50% probability of  $[\text{Cd}_2(\text{L}^{\text{Ph}})_2(\text{dmsO})_4] \cdot 2\text{DMSO}$  (adduct of complex 4). One of the coordinated dimethyl sulfoxide molecules is disordered at the sulfur atom (S4/S4B). The solvate dimethyl sulfoxide molecule is fully disordered. Symmetry code:  $-x+1, -y+1, -z+1$ .

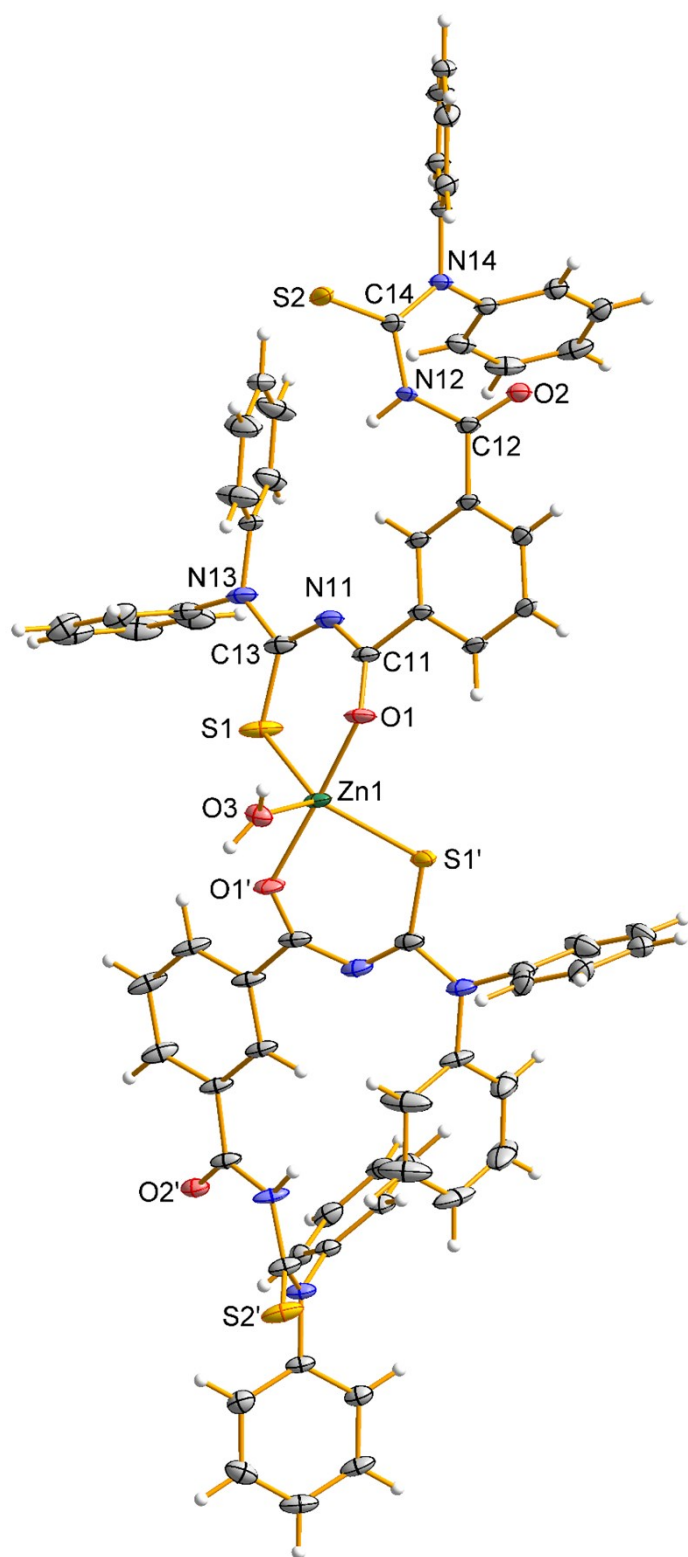

Figure S19. Anisotropic thermal ellipsoids plot at 50% probability of  $[\text{Zn}(\text{HL}^{\text{Ph}})_2(\text{H}_2\text{O})]$ . Symmetry code:  $' -x+1, y, -z+3/2$ .
